# Supplementary material for: Deregulation of small non-coding RNAs at the DLK1-DIO3 imprinted locus predicts lung cancer patient outcome
Source: PubMed Central journal article supplement (PMC5348368; doi:10.18632/oncotarget.13133), 2016-11-05
Supplement: oncotarget-07-80957-s001.pdf [file oncotarget-07-80957-s001.pdf]

## Deregulation of small non-coding RNAs at the *DLK1-DIO3* imprinted locus predicts lung cancer patient outcome

### Supplementary Materials

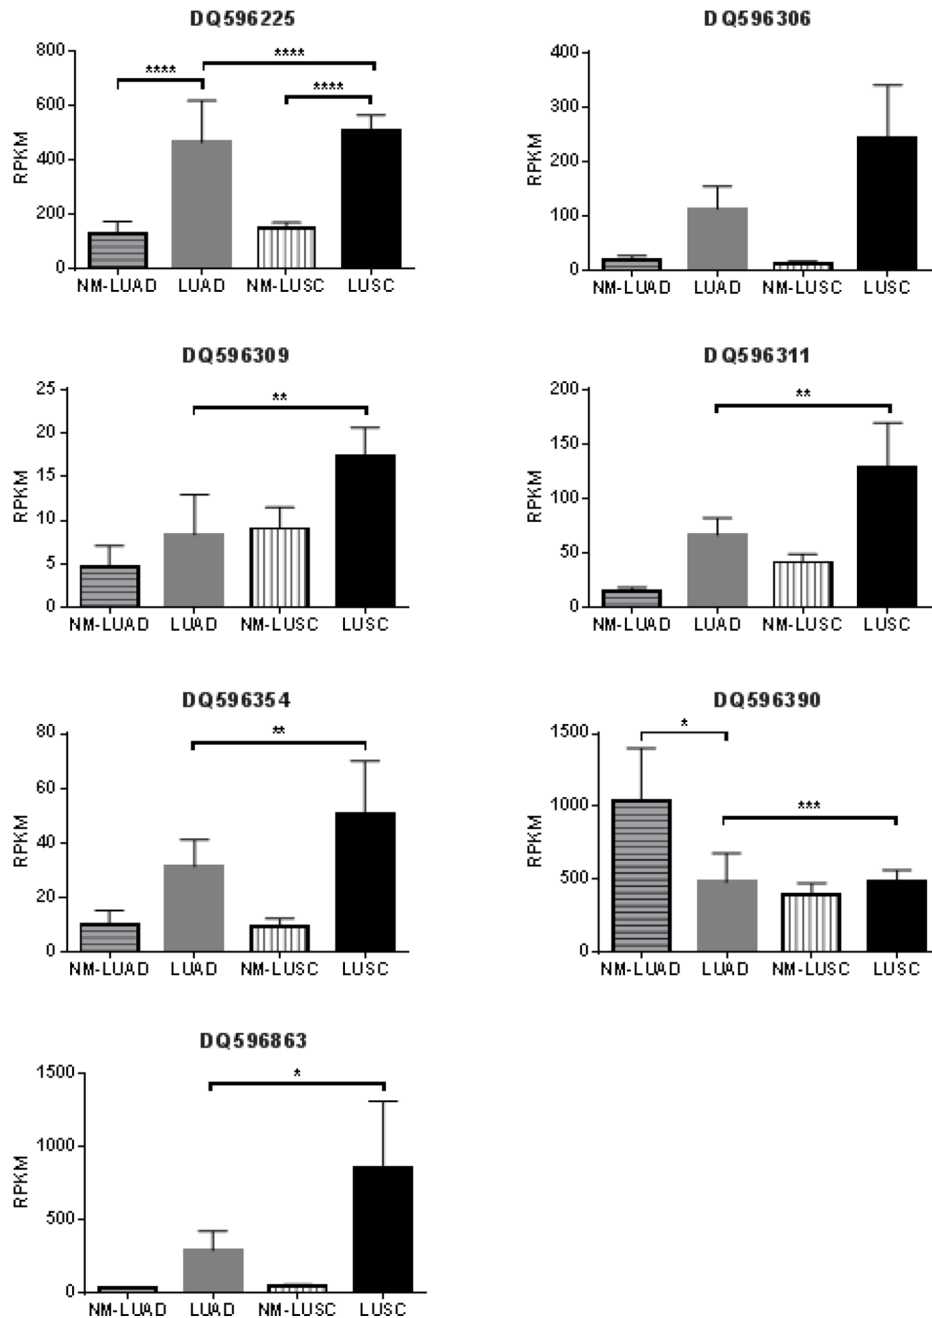

**Supplementary Figure S1: Histograms of piRNAs expressed in the external dataset (TCGA).** Histograms display mean RPKM expression plus SEM in 46 non-malignant lung (NM-LUAD) and 163 lung adenocarcinoma samples (LUAD), and 45 non-malignant lung (NM-LUSC) and 220 lung squamous cell carcinoma (LUSC) samples. Significant p-values resulting from Mann-Whitney *U* tests comparing gene expression are indicated as follows: \* $p < 0.05$  \*\* $p < 0.01$ . \*\*\* $p < 0.001$  \*\*\*\* $p < 0.0001$ .

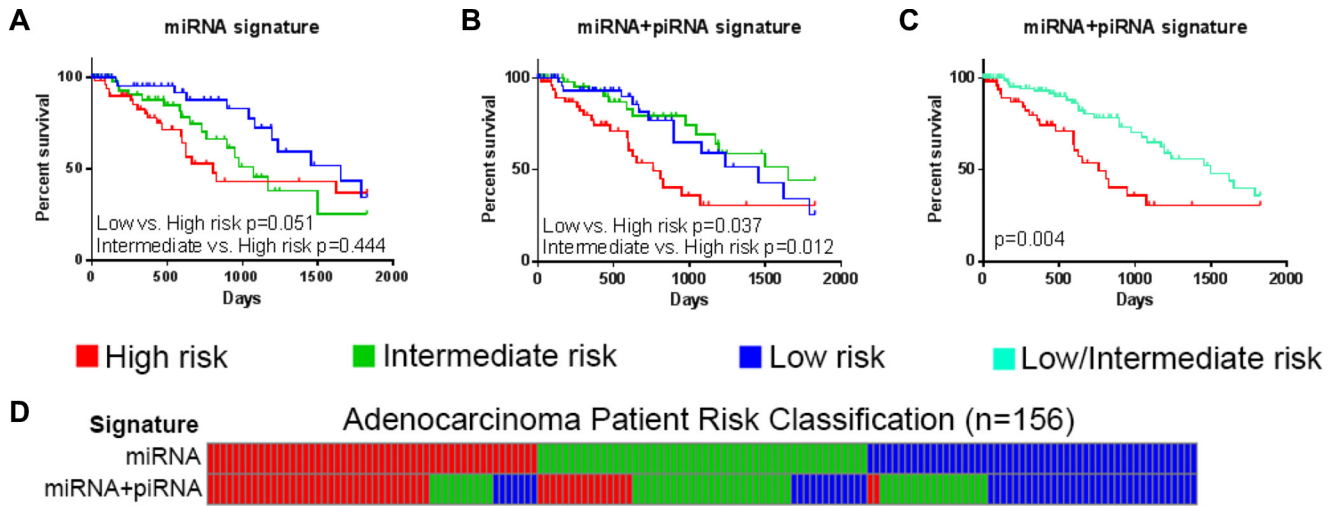

**Supplementary Figure S2: Overall survival of risk groups as defined in the lung adenocarcinoma external dataset (TCGA) ( $n = 156$ ).** Kaplan-Meier curves of high (red), intermediate (green), and low (blue) risk groups as defined by (A) the miRNA signature and (B) the miRNA+piRNA signature are shown. Panel (C) combines the low and intermediate risk groups (turquoise) and compares survival to the high risk group. Log-rank  $p$ -values of select survival comparisons are shown. (D) Patients are ordered by their miRNA signature-based risk classification (top) in order to illustrate the re-classification that occurs when the miRNA+piRNA signature (bottom) is applied to the dataset.

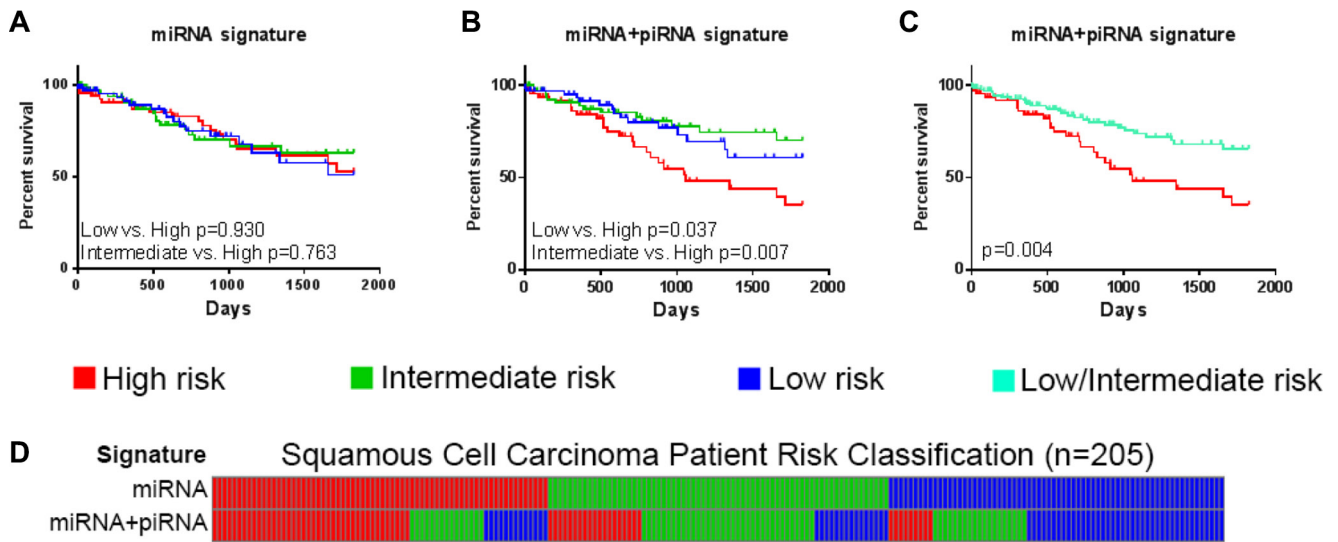

**Supplementary Figure S3: Overall survival of risk groups as defined in the lung squamous cell carcinoma external dataset (TCGA) ( $n = 205$ ).** Kaplan-Meier curves of high (red), intermediate (green), and low (blue) risk groups as defined by (A) the miRNA signature and (B) the miRNA+piRNA signature are shown. Panel (C) combines the low and intermediate risk groups (turquoise) and compares survival to the high risk group. Log-rank  $p$ -values of select survival comparisons are shown. (D) Patients are ordered by their miRNA signature-based risk classification (top) in order to illustrate the re-classification that occurs when the miRNA+piRNA signature (bottom) is applied to the dataset.

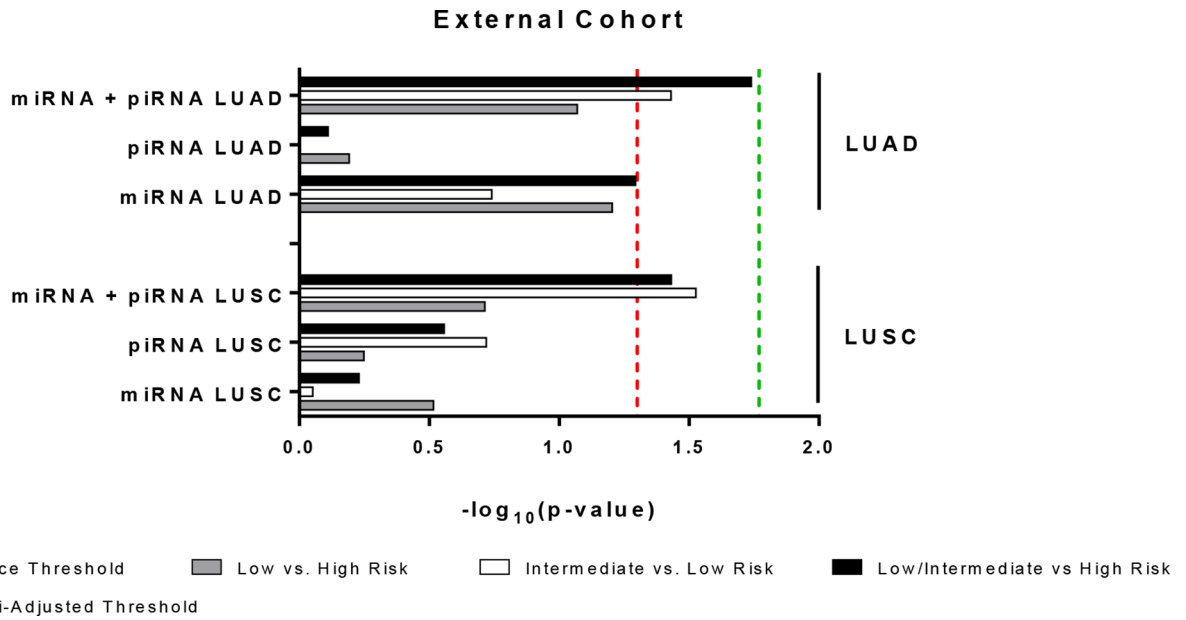

**Supplementary Figure S4: Log-rank  $p$ -value summary for recurrence-free survival predictions in the external dataset.** Bar lengths represent the  $-\log_{10}(p\text{-value})$  of each signature for LUAD (top) and LUSC (bottom) patients from the discovery cohort. Comparison across different risk groups are as follows: low vs. high risk (grey bars), intermediate vs. low risk (white bars) low vs. intermediate risk (black bars). Significance threshold is established at  $p\text{-value} = 0.05$  (red dashed line indicates  $-\log_{10} 0.05$ ), and at  $p\text{-value} = 0.017$  (Bonferroni-adjusted  $p\text{-value}$ ) (green dashed line indicates  $-\log_{10} 0.017$ ).
